# Supplementary material for: Multi-functional O2–H2 electrochemistry by an abundant mineral: a novel and sustainable alternative for noble metals in electrolyzers and metal–air batteries
Source: Royal Society of Chemistry journal article supplement (doi:10.1039/d2ya00153e), 2022-01-01
Supplement: d2ya00153e1.pdf [file d2ya00153e1.pdf]

# **Multi-functional O<sub>2</sub>-H<sub>2</sub> electrochemistry by an abundant mineral: A novel economical alternative for noble metals in electrolyzers and metal-air batteries**

Zinoy Manappadan<sup>a,b</sup>, Kaliaperumal Selvaraj<sup>a,b,c\*</sup>

*<sup>a</sup>Nano and Computational Materials Lab., Catalysis and Inorganic Chemistry Division, CSIR-National Chemical Laboratory, Pune 411008, India*

*<sup>b</sup>Academy of Scientific and Innovative Research (AcSIR), Ghaziabad-201002, India*

*<sup>c</sup>Centre of Microscopy Facility, CSIR-National Chemical Laboratory, Pune 411008, India*

*\*Corresponding author: [k.selvaraj@ncl.res.in](mailto:k.selvaraj@ncl.res.in), [kselva@gmail.com](mailto:kselva@gmail.com)*

## Calculation of turnover frequency (TOF)

### 1. For OER

TOF for the OER is calculated for the four-electron pathway. The TOF can be calculated from the following equation [55]:

$$TOF (s^{-1}) = \frac{\text{number of oxygen turnover per } cm^2 \text{ geometric area}}{\text{the active sites per } cm^2 \text{ geometric area}}$$

$$TOF (s^{-1}) = \frac{\text{number of oxygen turnover}}{\text{the active sites}} = \frac{j/4F}{m}$$

where j is the current density for OER at a given overpotential, F is Faraday constant (96485.3 As mol<sup>-1</sup>), m is the number of moles of active sites, and (j/4F) represents the total oxygen turnover in OER.

The HAG catalyst loading on the carbon paper was 0.4 mg/cm<sup>2</sup>. The TOF is calculated at the overpotential of 350 mV where the OER current is 21.33 mA cm<sup>-2</sup> in 1 M KOH. An overpotential of 350 mV is selected for the TOF calculation for an easier comparison with the previously reported TOF values in the literature.

The number of oxygen turnover for OER is calculated from the current density according to the following equation:

$$N_{O_2}(cm^2s) = \frac{1}{1000} \times \frac{j(\frac{mA}{cm^2})}{96485 C} \times \frac{1 \text{ mole } e^-}{4 \text{ mole } e^-} \times \frac{1 \text{ mol } O_2}{6.02 \times 10^{23} \times \frac{1}{\text{mol } O_2}}$$

Number of oxygen turnover for OER (j/4F) is then calculated as follows:

$$\frac{21.33 \frac{mA}{cm^2}}{1000} \times \frac{1 \text{ mole } e^-}{96485 C} \times \frac{1 \text{ mol } O_2}{4 \text{ mole } e^-} \times \frac{1}{6.02 \times 10^{23}} = 3.3 \times 10^{16} cm^2s$$

The percentage composition of HAG in the electrode ink is 80%. That makes 1.76 mg of HAG. Hence the active site density of Ca and P can be calculated using the equation

$$\frac{\text{Mass loading} \frac{mg}{cm^2} \times \text{Mass of species}}{\text{Molecular mass of species} \frac{mg}{mol} \times 6.02 \times 10^{23}}$$

Hence the active site density of Ca is

$$\frac{1.76 \frac{mg}{cm^2} \times 0.57}{40.078 \times 10^3 \frac{mg}{mol} \times 6.02 \times 10^{23}} = 1.5 \times 10^{19} \text{ sites cm}^{-2}$$

The active site density of P is

$$\frac{1.76 \frac{mg}{cm^2} \times 0.26}{30.974 \times 10^3 \frac{mg}{mol} \times 6.02 \times 10^{23}} = 9.3 \times 10^{18} \text{ sites cm}^{-2}$$

And thus, the TOF of Ca is calculated as below:

$$\text{TOF(s}^{-1}\text{) for OER} = \frac{3.3 \times 10^{16} \left(\frac{1}{cm^2 s}\right)}{1.51 \times 10^{19} \frac{\text{Sites}}{cm^2}} = 2.2 \times 10^{-3} \text{ s}^{-1}$$

Similarly for P,

$$\text{TOF(s}^{-1}\text{) for OER} = \frac{3.3 \times 10^{16} \left(\frac{1}{cm^2 s}\right)}{9.3 \times 10^{18} \frac{\text{Sites}}{cm^2}} = 3.5 \times 10^{-3} \text{ s}^{-1}$$

## 2. For HER

$$TOF (s^{-1}) = \frac{\text{number of hydrogen turnover per } cm^2 \text{ geometric area}}{\text{the active sites per } cm^2 \text{ geometric area}}$$

The TOF is calculated at the overpotential of 150 mV where the HER current is 131 mA cm<sup>-2</sup> in 1 M KOH. As the mass loading is the same as in the case of OER, the active site density of Ca and P stays the same. The number of hydrogen turn over is calculated as,

$$N(H_2) = \frac{131 \frac{mA}{cm^2}}{1000} \times \frac{1 \text{ mole } e^-}{96485 C} \times \frac{1 \text{ mol } O_2}{2 \text{ mole } e^-} \times 6.02 \times 10^{23} = 1.02 \times 10^{17} cm^2 s$$

$$TOF \text{ of Ca} = \frac{2.04}{40.078 \times 10^3 \frac{mg}{mol}} \times 10^{17} = 6.75 \times 10^{-3} s^{-1}$$

$$TOF \text{ of P} = \frac{2.04}{40.078 \times 10^3 \frac{mg}{mol}} \times 10^{17} = 1.1 \times 10^{-2} s^{-1}$$

### Calculation of mass activity

1. Mass activity for OER

$$\text{Mass activity (A/mg)} = j/m \text{ at } 350 \text{ mV} = 0.02133/2.2 = 9.7 \times 10^{-3} \text{ A/mg}$$

2. Mass activity for HER

$$\text{Mass activity (A/mg)} = j/m \text{ at } 150 \text{ mV} = 0.131/2.2 = 5.9 \times 10^{-2} \text{ A/mg}$$

3. Mass activity of ORR

$$\text{Mass activity (A/mg)} = j/m \text{ at } 0.7 \text{ V} = 0.41 \times 10^{-3} / 2 \times 10^{-2} = 2.05 \times 10^{-2} \text{ A/mg}$$

## Supplementary Figures

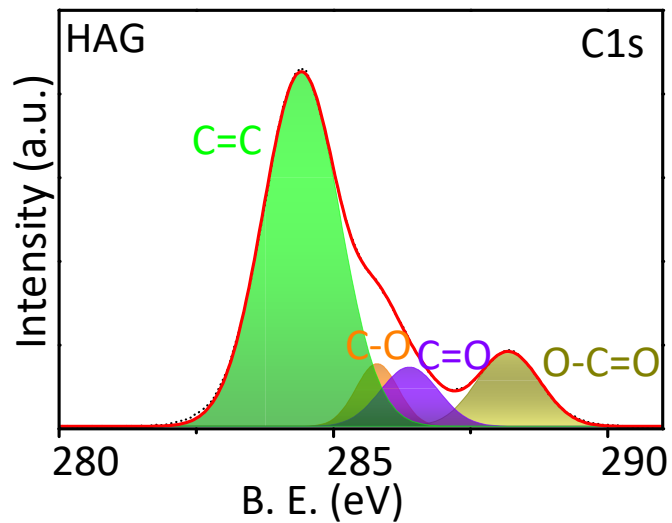

Figure S1: Core-level XPS spectra of C1s in HAG

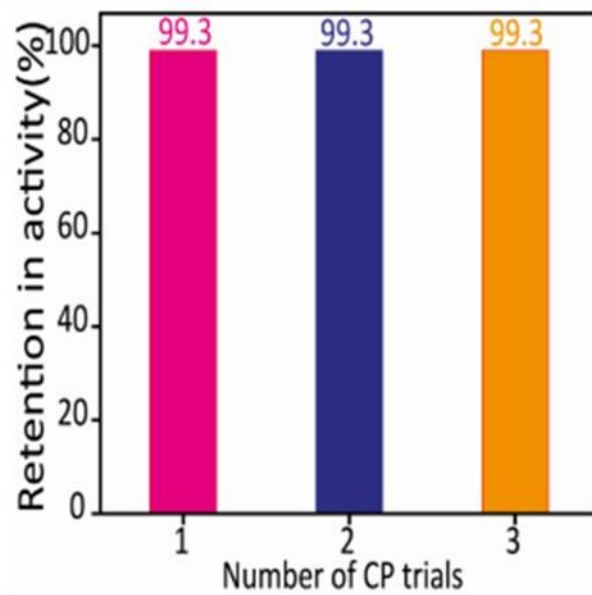

Figure S2: Retention of HER activity after each chronopotentiometric step

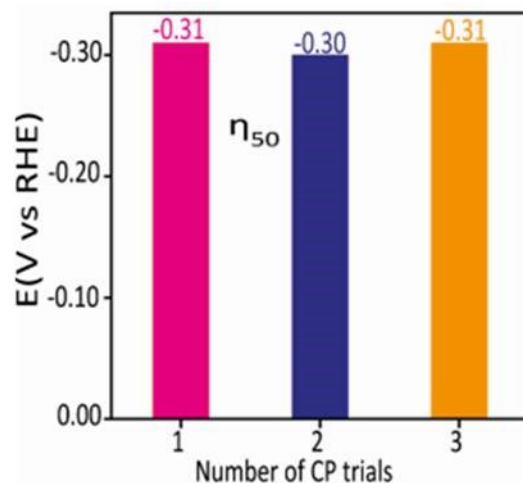

Figure S3: Comparison of  $\eta_{50}$  of the polarograms taken after each CP run.

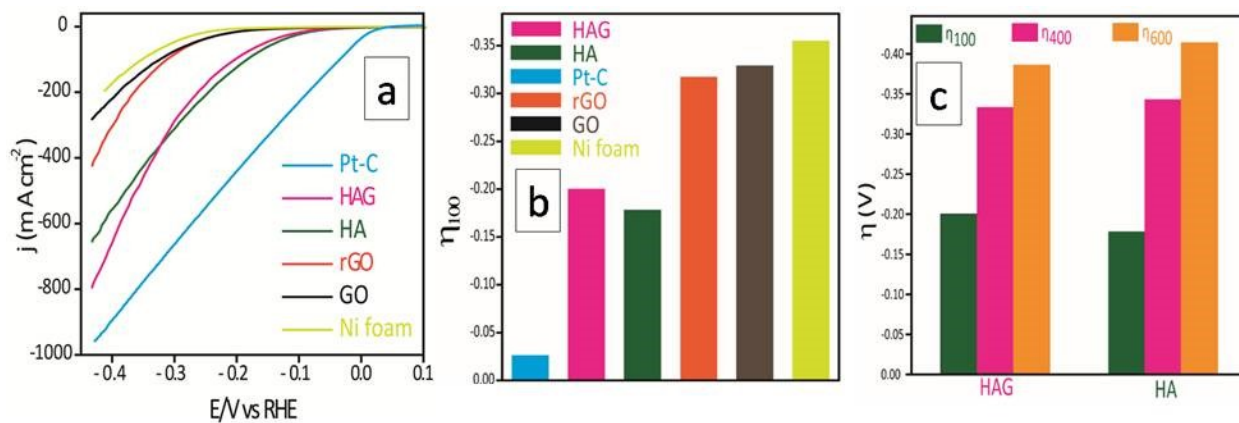

Figure S4: (a) Polarograms comparing the HER activity of Pt-C, HAG, HA, rGO, GO, and the Ni foam substrate (taken at 2 mV/ sec after 85 % iR compensation) (b) Bar diagram showing the  $\eta_{100}$  values of all the materials. (c) Bar diagram showing the  $\eta_{100}$ ,  $\eta_{400}$ ,  $\eta_{600}$  values of HA & HAG.

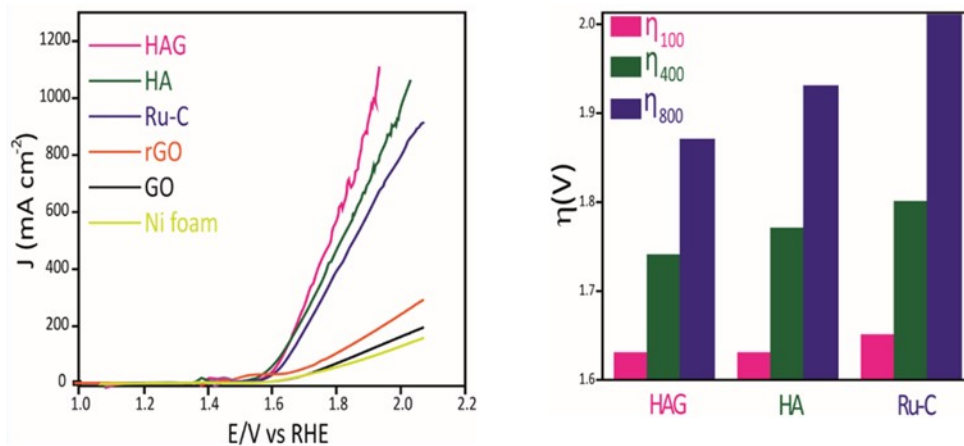

Figure S5: (a) Polarograms comparing the OER activity of Pt-C, HAG, HA, rGO, GO, and the Ni foam substrate (taken at 2 mV/ sec after 85 % iR compensation) (b) Bar diagram showing the  $\eta_{100}$ ,  $\eta_{400}$ ,  $\eta_{800}$  values of HA, HAG and Ru-C.

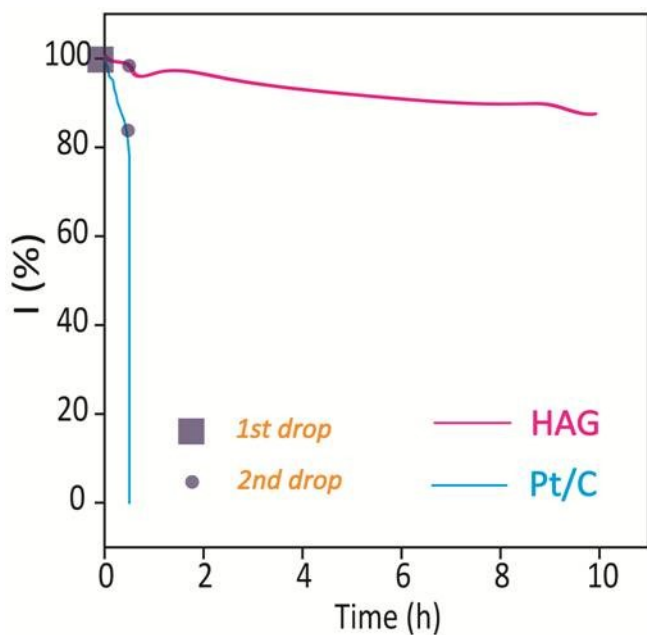

Figure S6: (a) Methanol poisoning test for HAG and Pt/C Supplementary Table

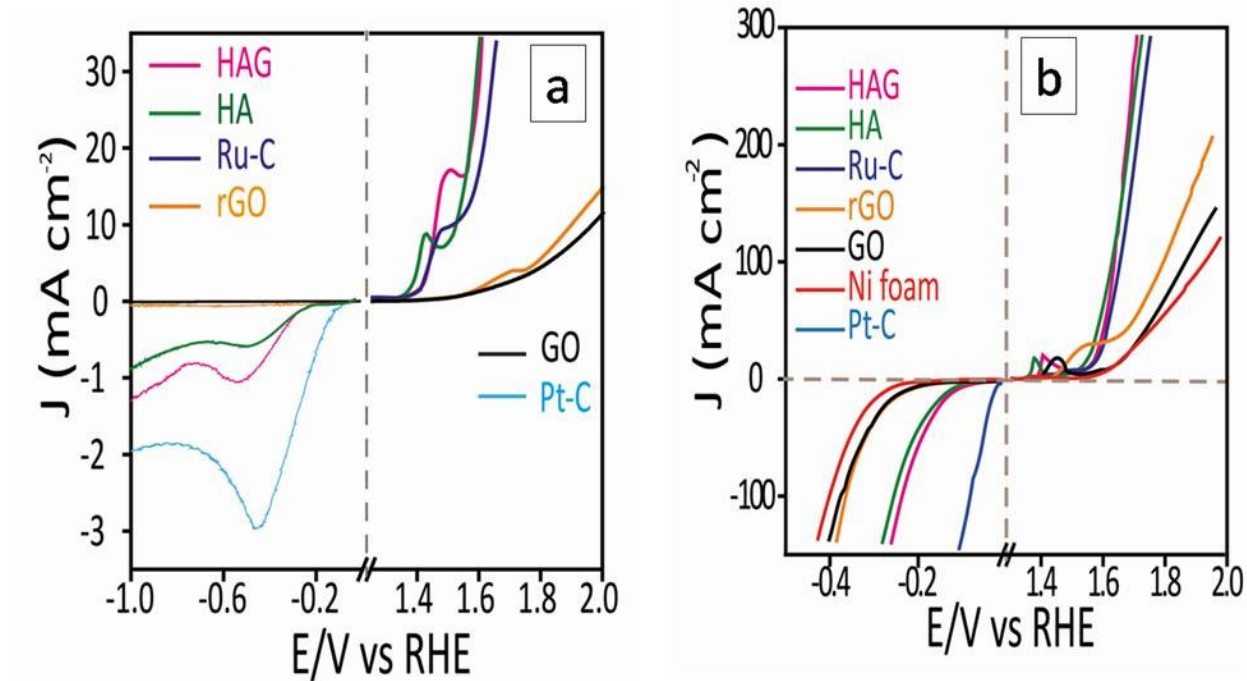

Figure S7: The bifunctional performance of HAG, HA, Ru-C, rGO and GO towards, (a) OER –

ORR  
 react  
 ion  
 pair  
 and  
 (b)  
 OER  
 -  
 HER  
 react

| Name  | Peak BE | FWHM eV | Area (P)<br>CPS.eV | Atomic % | Q |
|-------|---------|---------|--------------------|----------|---|
| O 1s  | 537.33  | 2.93    | 2114470            | 52.03    | 1 |
| Ca 2p | 353.92  | 2.91    | 1492489            | 15.49    | 1 |
| P 2p  | 140.01  | 2.96    | 297972             | 11.95    | 1 |
| C 1s  | 291     | 6.64    | 345395.9           | 20.54    | 1 |

ion pair.



Table ST1: Quantitative elemental information from the XPS from where the Ca/P ratio was calculated (The rows containing the values of Ca and P are in highlights)

| S No | Catalyst             | Electrolyte | $\eta_{10}$ HER (V) | $\eta_{10}$ OER (V) | $\Delta E$ (V vs RHE) | Reference    |
|------|----------------------|-------------|---------------------|---------------------|-----------------------|--------------|
| 1    | Ni2P                 | 1 M KOH     | -0.220              | 1.52                | 1.74                  | S1           |
| 2    | Co-P/NC              | 1 M KOH     | -0.154              | 1.55                | 1.70                  | S2           |
| 3    | NiCoP/rGO            | 1 M KOH     | -0.209              | 1.5                 | 1.71                  | S3           |
| 4    | Ni3S2/NF             | 1 M KOH     | -0.223              | 1.49                | 1.71                  | S4           |
| 5    | Ni3FeN/r-GO-20       | 1 M KOH     | -0.213              | 1.5                 | 1.71                  | S5           |
| 6    | Mo2C@CS              | 1 M KOH     | -0.178              | 1.55                | 1.73                  | S6           |
| 7    | Co4Mo2@NC/Ti         | 1 M KOH     | -0.218              | 1.56                | 1.78                  | S7           |
| 8    | CoOx@CN              | 1 M KOH     | -0.232              | 1.49                | 1.72                  | S8           |
| 9    | EG/Co0.85Se/NiFe-LDH | 1 M KOH     | -0.260              | 1.5                 | 1.76                  | S9           |
| 10   | CoMnO@CN             | 1 M KOH     | -0.71               | 1.65                | 2.36                  | S10          |
| 11   | EBP@NG               | 1 M KOH     | -0.191              | 1.58                | 1.77                  | S11          |
| 12   | ANSI                 | 1 M KOH     | -0.222              | 1.51                | 1.73                  | S12          |
| 13   | NOGB                 | 1 M KOH     | -0.200              | 1.63                | 1.83                  | S13          |
| 14   | NDCHN                | 1 M KOH     | -0.201              | 1.52                | 1.72                  | S14          |
| 15   | HAG/rGO              | 1 M KOH     | -0.108              | 1.58                | 1.688                 | Present work |

Table ST2: Summary of the HER and OER activities of recently reported bifunctional electrocatalysts for water splitting

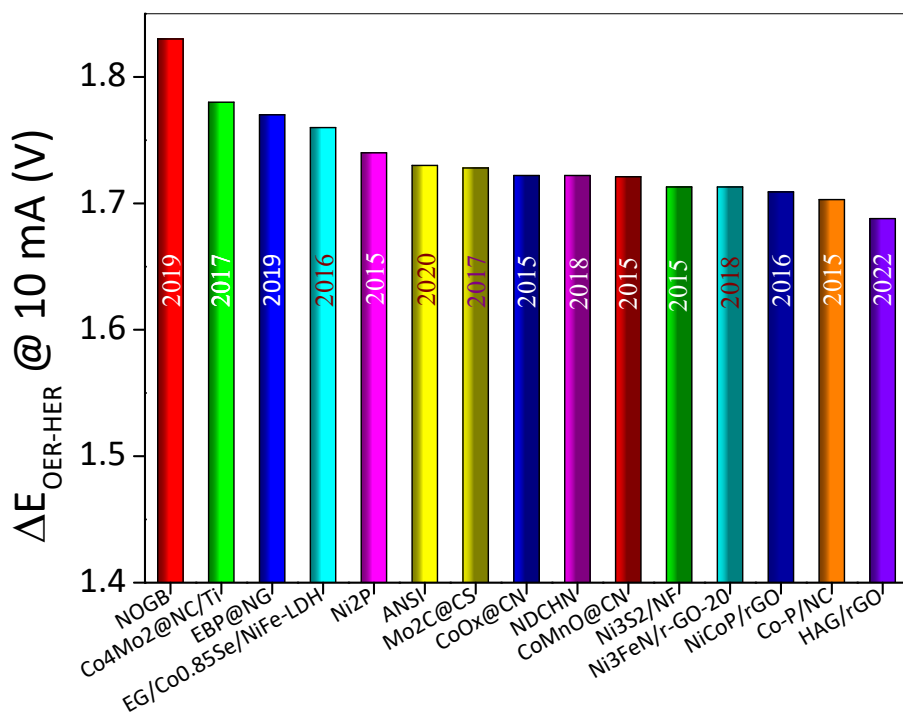

Figure S8: Bar diagram showing HAG over performing recently reported OER-HER bifunctional electrocatalysts

| S No | Catalyst                                                         | Electrolyte | $\eta_{10}$ OER (V vs RHE) | ORR $E_{1/2}$ (V vs RHE) | $\Delta E = \eta_{10} - E_{1/2}$ (V) | Reference    |
|------|------------------------------------------------------------------|-------------|----------------------------|--------------------------|--------------------------------------|--------------|
| 1    | NCNF-1000                                                        | 1M KOH      | 1.84                       | 0.82                     | 1.02                                 | S15          |
| 2    | P-gC <sub>3</sub> N <sub>4</sub>                                 | 1M KOH      | 1.63                       | 0.67                     | 0.96                                 | S16          |
| 3    | Mn oxide film                                                    | 1 M KOH     | 1.77                       | 0.73                     | 1.04                                 | S17          |
| 4    | Fe@N-C                                                           | 1 M KOH     | 1.71                       | 0.83                     | 0.88                                 | S18          |
| 5    | N-graphene CNT                                                   | 1 M KOH     | 1.63                       | 0.63                     | 1                                    | S19          |
| 6    | Co <sub>3</sub> O <sub>4</sub> /Co <sub>2</sub> MnO <sub>4</sub> | 1 M KOH     | 1.77                       | 0.68                     | 1.09                                 | S20          |
| 7    | Mn <sub>x</sub> O <sub>y</sub> /N-C                              | 1 M KOH     | 1.68                       | 0.81                     | 0.87                                 | S21          |
| 8    | LiCoO <sub>2</sub>                                               | 0.1 M KOH   | 1.67                       | 0.70                     | 0.97                                 | S22          |
| 9    | N-MWCNT                                                          | 0.1 M KOH   | 0.75 (SCE)                 | -0.3 (SCE)               | 1.05                                 | S23          |
| 10   | HAG                                                              | 0.1 M KOH   | 1.58                       | 0.74                     | 0.84                                 | Present work |

Table ST3: Summary of the ORR and OER activities of recently reported bifunctional electrocatalysts for water splitting

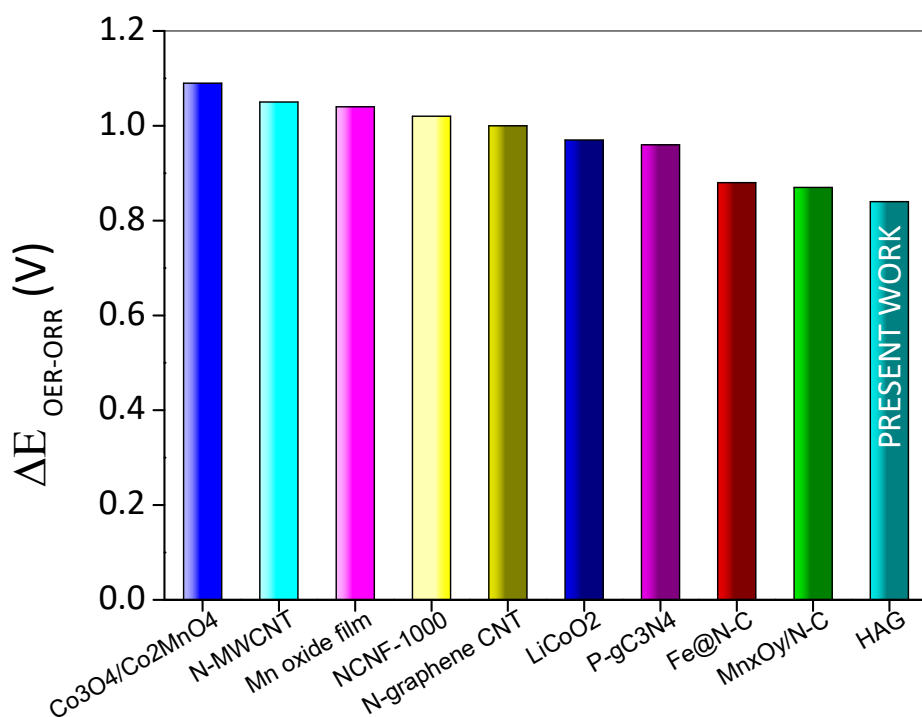

Figure S9: Bar diagram showing HAG over performing recently reported OER-ORR bifunctional electrocatalysts

## References

- S1. L.-A. Stern, L. Feng, F. Song and X. Hu, *Energy Environ. Sci.*, 2015, 8, 2347-2351
- S2. B. You, N. Jiang, M. Sheng, S. Gul, J. Yano and Y. Sun, *Chem. Mater.*, 2015, 27, 7636- 7642
- S3. J. Li, M. Yan, X. Zhou, Z. Q. Huang, Z. Xia, C. R. Chang, Y. Ma and Y. Qu, *Adv. Funct. Mater.*, 2016, 26, 6785-6796
- S4. L.-L. Feng, G. Yu, Y. Wu, G.-D. Li, H. Li, Y. Sun, T. Asefa, W. Chen and X. Zou, *J. Am. Chem. Soc.*, 2015, 137, 14023-14026
- S5. Y. Gu, S. Chen, J. Ren, Y. A. Jia, C. Chen, S. Komarneni, D. Yang and X. Yao, *ACS Nano*, 2018, 12, 245-253
- S6. H. Wang, Y. Cao, C. Sun, G. Zou, J. Huang, X. Kuai, J. Zhao and L. Gao, *ChemSusChem*, 2017, 10, 3540-3546
- S7. J. Jiang, Q. Liu, C. Zeng and L. Ai, *J. Mater. Chem. A*, 2017, 5, 16929-16935
- S8. H. Jin, J. Wang, D. Su, Z. Wei, Z. Pang and Y. Wang, *J. Am. Chem. Soc.*, 2015, 137, 2688-2694
- S9. Y. Hou, M. R. Lohe, J. Zhang, S. Liu, X. Zhuang and X. Feng, *Energy Environ. Sci.*, 2016, 9, 478–483
- S10. J. Li, Y. Wang, T. Zhou, H. Zhang, X. Sun, J. Tang, L. Zhang, A. M. Al-Enizi, Z. Yang and G. Zheng, *J. Am. Chem. Soc.*, 2015, 137, 14305–14312
- S11. Zhongke Yuan, Jing Li, Meijia Yang, Zhengsong Fang, Junhua Jian, Dingshan Yu, Xudong Chen, Liming Dai, : *J. Am. Chem. Soc.* 2019, 141, 4972–4979
- S12. Li X, Xu Y, Li Y, Fan X, Zhang G, Zhang F, et al. Increasing the heteroatoms doping percentages of graphene by porous engineering for enhanced electrocatalytic activities. *J Colloid Interface Sci* 2020;577:101e8

- S13. Hu Q, Li G, Li G, Liu X, Zhu B, Chai X, et al. Trifunctional electrocatalysis on dual-doped graphene nanoringseintegrated boxes for efficient water splitting and ZneAir batteries. *Adv Energy Mater* 2019;9
- S14. Zhang L, Hu JS, Huang XH, Song J, Lu SY. Particle-in-box nanostructured materials created via spatially confined pyrolysis as high performance bifunctional catalysts for electrochemical overall water splitting. *Nano Energy* 2018;48:489e99
- S15. Qin Liu , Yaobing Wang , Liming Dai , Jiannian Yao, Scalable Fabrication of Nanoporous Carbon Fiber Films as Bifunctional Catalytic Electrodes for Flexible Zn-Air Batteries, *Adv. Mater.* 2016, 28, 3000–3006
- S16. T. Y. Ma , J. Ran , S. Dai , M. Jaroniec , S. Z. Qiao , *Angew. Chem.* 2015 , 127 , 4729
- S17. Y. Gorlin , T. F. Jaramillo , *J. Am. Chem. Soc.* 2010 , 132 , 13612
- S18. J. Wang, H. Wu, D. Gao, S. Miao, G. Wang, X. Bao, *Nano Energy* 2015, 13, 387-396
- S19. G. L. Tian, M. Q. Zhao, D. Yu, X.Y. Kong, J. Q. Huang, Q. Zhang, F. Wei, *Small* 2015, 10, 2251-2259
- S20. J. Masa, W. Xia, I. Sinev, A. Zhao, Z. Sun, S. Grützke, P. Weide, M. Muhler, W. Schuhmann, *Angew. Chem. Int. Ed.* 2014, 53, 8508–8512
- S21. D. U. Lee, J.-Y. Choi, K. Feng, H. W. Park, Z. Chen, *Adv. Energy Mater.* 2014, DOI: 10.1002/aenm.201301389
- S22. Maiyalagan, T., Jarvis, K., Therese, S. *et al.* Spinel-type lithium cobalt oxide as a bifunctional electrocatalyst for the oxygen evolution and oxygen reduction reactions. *Nat Commun* **5**, 3949 (2014)
- S23. Gui-Li Tian , Qiang Zhang , Bingsen Zhang , Yu-Guang Jin , Jia-Qi Huang , Dang Sheng Su , Fei Wei, Toward Full Exposure of “Active Sites”: Nanocarbon Electrocatalyst with Surface Enriched Nitrogen for Superior Oxygen Reduction and Evolution Reactivity, *Adv. Funct. Mater.* 2014, 24, 5956–5961
